# Supplementary material for: Cyclometalated iridium(iii) tetrazine complexes for mitochondria-targeted two-photon photodynamic therapy
Source: Royal Society of Chemistry journal article supplement (doi:10.1039/d4dt01665c), 2024-01-01
Supplement: d4dt01665c1.pdf [file d4dt01665c1.pdf]

## Supporting Information

### **Cyclometalated iridium(III) tetrazine complexes for mitochondria-targeted two-photon photodynamic therapy**

**Zanru Tan,<sup>‡a</sup> Mingwei Lin,<sup>‡a</sup> Jiangping Liu,<sup>\*b</sup> Huihui Wu,<sup>\*c</sup> and Hui Chao<sup>\*a,d</sup>**

*<sup>a</sup> MOE Key Laboratory of Bioinorganic and Synthetic Chemistry, Guangdong Basic Research Center of Excellence for Functional Molecular Engineering, School of Chemistry, Sun Yat-Sen University, Guangzhou, 510275, P. R. China. Email: ceschh@mail.sysu.edu.cn*

*<sup>b</sup> The Institute of Flexible Electronics (IFE, Future Technologies), Xiamen University, Xiamen, 361102, P. R. China. Email: liujping@xmu.edu.cn*

*<sup>c</sup> Department of Dermatology, The East Division of the First Affiliated Hospital, Sun Yat-Sen University, Guangzhou, 510700, P. R. China. Email: cometvivi@126.com*

*<sup>d</sup> MOE Key Laboratory of Theoretical Organic Chemistry and Functional Molecule, School of Chemistry and Chemical Engineering, Hunan University of Science and Technology, Xiangtan, 400201, P. R. China*

<sup>‡</sup> These authors contributed equally to this work.

# Table of Contents

|                                                                                                                    |    |
|--------------------------------------------------------------------------------------------------------------------|----|
| <b>Fig. S1</b> Synthetic route of the iridium(III) complexes .....                                                 | 2  |
| <b>Fig. S2</b> Emission spectra of the Ir(III) complexes under different oxygen conditions .....                   | 3  |
| <b>Fig. S3</b> Two-photon absorption cross-sections .....                                                          | 4  |
| <b>Fig. S4</b> Fluorescence enhancement of <b>Ir-pbt-Tz</b> .....                                                  | 5  |
| <b>Fig. S5</b> ESR spectra.....                                                                                    | 6  |
| <b>Fig. S6</b> Plots of the absorbance decay of DPBF .....                                                         | 7  |
| <b>Fig. S7</b> Oil-water partition coefficient of designed complexes.....                                          | 8  |
| <b>Fig. S8</b> Cellular Localization.....                                                                          | 9  |
| <b>Fig. S9</b> <b>Ir-pbt-Tz</b> concentration-dependent flow cytometry analysis of cells upon irradiation<br>..... | 10 |
| <b>Fig. S10</b> CLSM imaging of ROS generation in MCTs after two-photon PDT .....                                  | 11 |
| <b>Fig. S11</b> HR-ESI-MS spectrum of <b>Ir-ppy-Tz</b> .....                                                       | 12 |
| <b>Fig. S12</b> <sup>1</sup> H NMR spectrum of <b>Ir-ppy-Tz</b> .....                                              | 13 |
| <b>Fig. S13</b> <sup>13</sup> C NMR spectrum of <b>Ir-ppy-Tz</b> .....                                             | 14 |
| <b>Fig. S14</b> HR-ESI-MS spectrum of <b>Ir-pbt-Tz</b> .....                                                       | 15 |
| <b>Fig. S15</b> <sup>1</sup> H NMR spectrum of <b>Ir-pbt-Tz</b> .....                                              | 16 |
| <b>Fig. S16</b> <sup>13</sup> C NMR spectrum of <b>Ir-pbt-Tz</b> .....                                             | 17 |
| <b>Fig. S17</b> HR-ESI-MS spectrum of <b>Ir-dfppy-Tz</b> .....                                                     | 18 |
| <b>Fig. S18</b> <sup>1</sup> H NMR spectrum of <b>Ir-dfppy-Tz</b> .....                                            | 19 |
| <b>Fig. S19</b> <sup>19</sup> F NMR spectrum of <b>Ir-dfppy-Tz</b> .....                                           | 20 |
| <b>Fig. S20</b> <sup>13</sup> C NMR spectrum of <b>Ir-dfppy-Tz</b> .....                                           | 21 |
| <b>Table S1</b> photophysical properties of designed compounds .....                                               | 22 |
| <b>Table S2</b> single oxygen quantum yields of complexes .....                                                    | 23 |

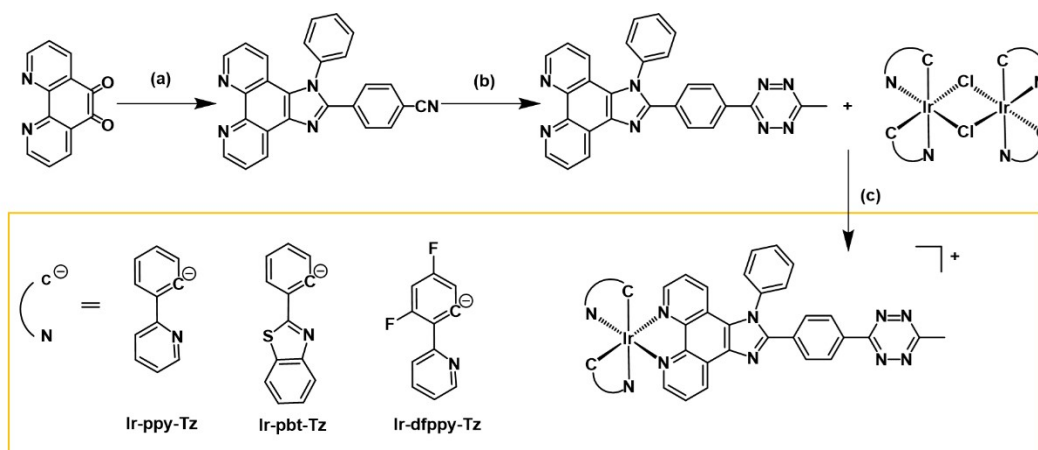

**Fig. S1** Synthetic route of the iridium(III) complexes. (a) 4-cyanobenzaldehyde, aniline, NH<sub>4</sub>OAc, HOAc, 120 °C, 12 h; (b) MeCN, N<sub>2</sub>H<sub>4</sub>·H<sub>2</sub>O, Zn(TOF)<sub>2</sub>, dioxane, Ar, 85 °C, 24 h; (c) CHCl<sub>3</sub>/MeOH(1:1, v/v), Ar, 85 °C, 6 h.

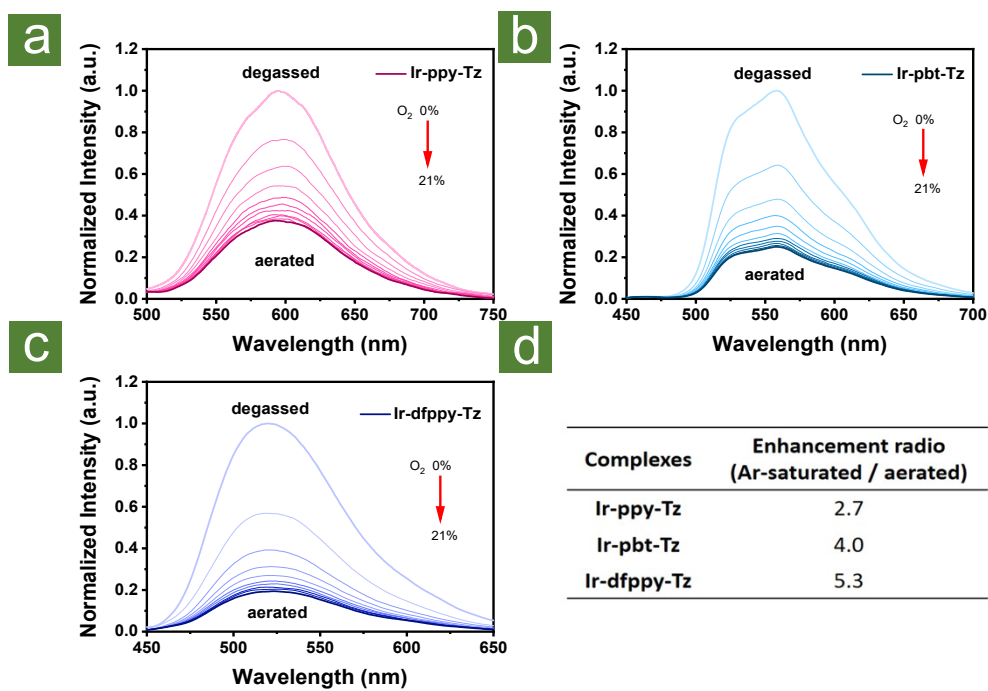

**Fig. S2** The emission spectra ( $\lambda_{\text{ex}} = 405$  nm) of **Ir-ppy-Tz** (a), **Ir-pbt-Tz** (b), **Ir-dfppy-Tz** (c) in methanol solution (10  $\mu$ M) under different oxygen levels, and (d) the emission intensity ratio of the complexes under argon to that under air.

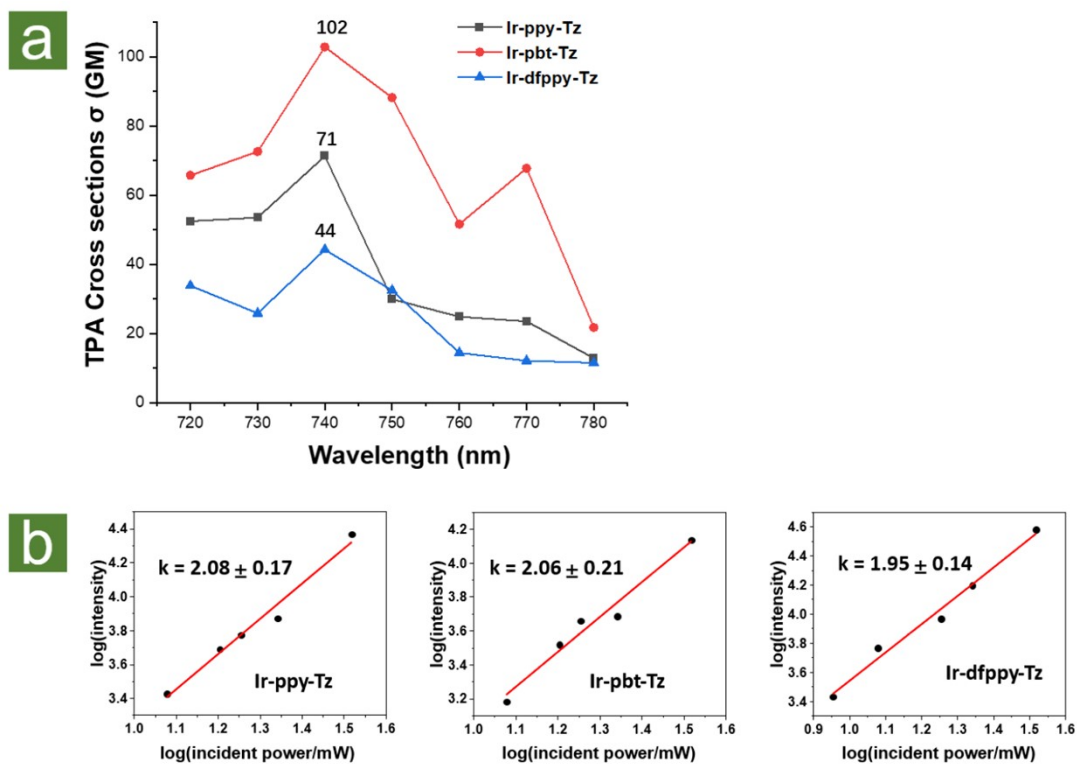

**Fig. S3** (a) Two-photon absorption cross-sections of **Ir-ppy-Tz**, **Ir-pbt-Tz**, and **Ir-dfppy-Tz**, respectively, at 720 ~ 780 nm. (b) Validation of two-photon excitation by linear fitting of the logarithmic plots of the incident femtosecond laser power *versus* luminescence intensity of the compounds at 740 nm.

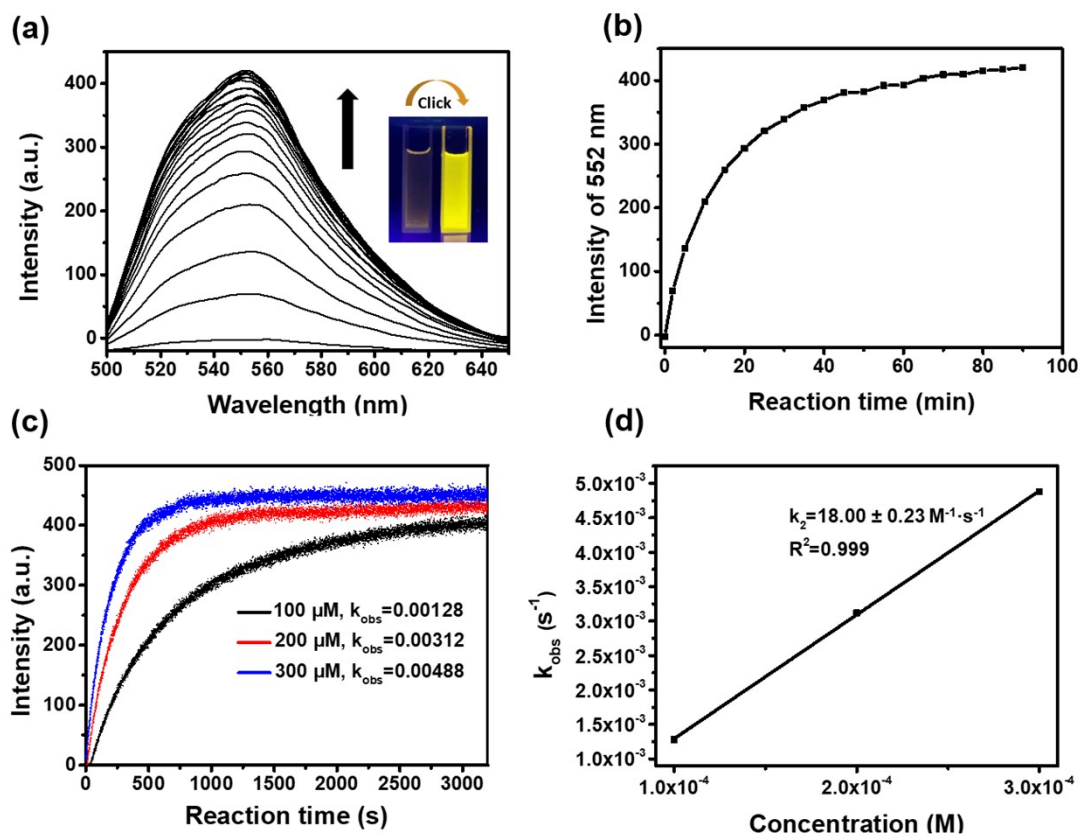

**Fig. S4** The bioorthogonal reaction of **Ir-pbt-Tz** (10  $\mu\text{M}$ ) and **BCN** (100-300  $\mu\text{M}$ ) in methanol/water (1:1, v/v) at 298 K.

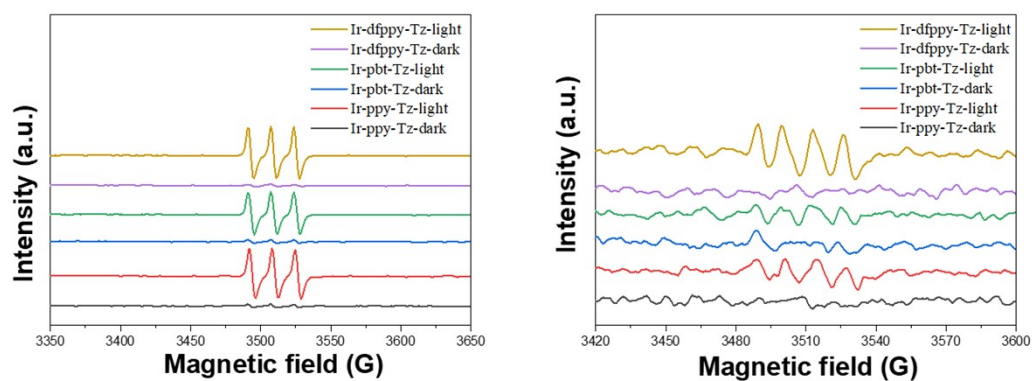

**Fig. S5** ESR spectra of  $^1\text{O}_2$  trapped by TEMP (left) /  $\text{O}_2^{\text{ca-}}$  trapped by DMPO (right) in the Ir(III) complex solution with or without light input.

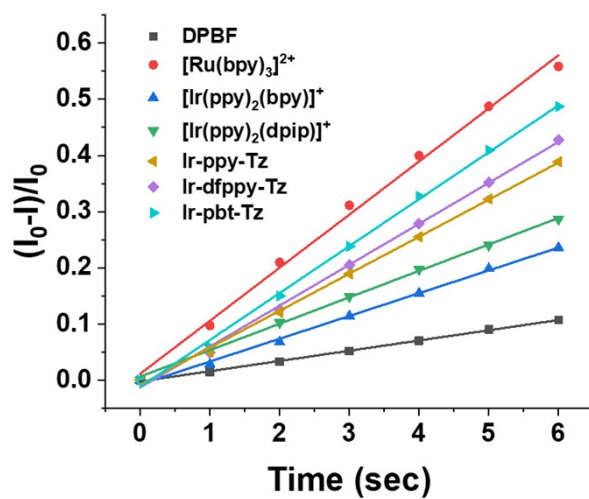

**Fig. S6** Plots of the cumulative decrease in optical density of DPBF (60  $\mu\text{M}$ ) at 411 nm along irradiation time ( $\lambda_{\text{irr}}=405$  nm) in the presence of the indicated complexes. [Ru(bpy)<sub>3</sub>]<sup>2+</sup> as the standard.



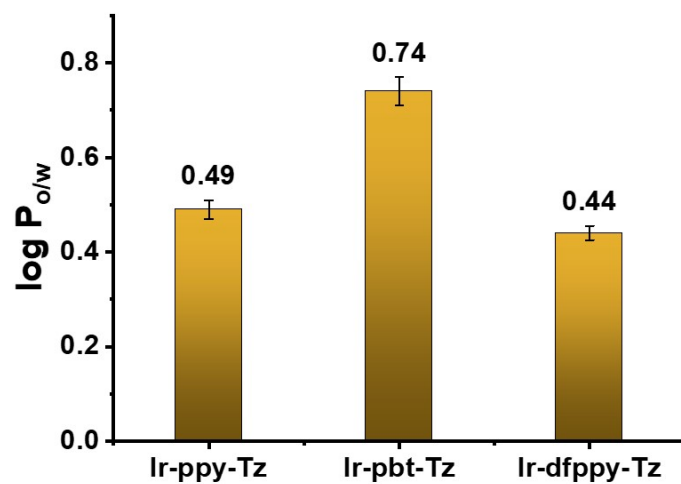

**Fig. S7** Partition coefficient ( $\log P_{o/w}$ ) of the indicated complexes. All the experiments were performed as duplicates of triplicates ( $n = 3$  independent experiments). The error bars represent the standard deviation (SD).

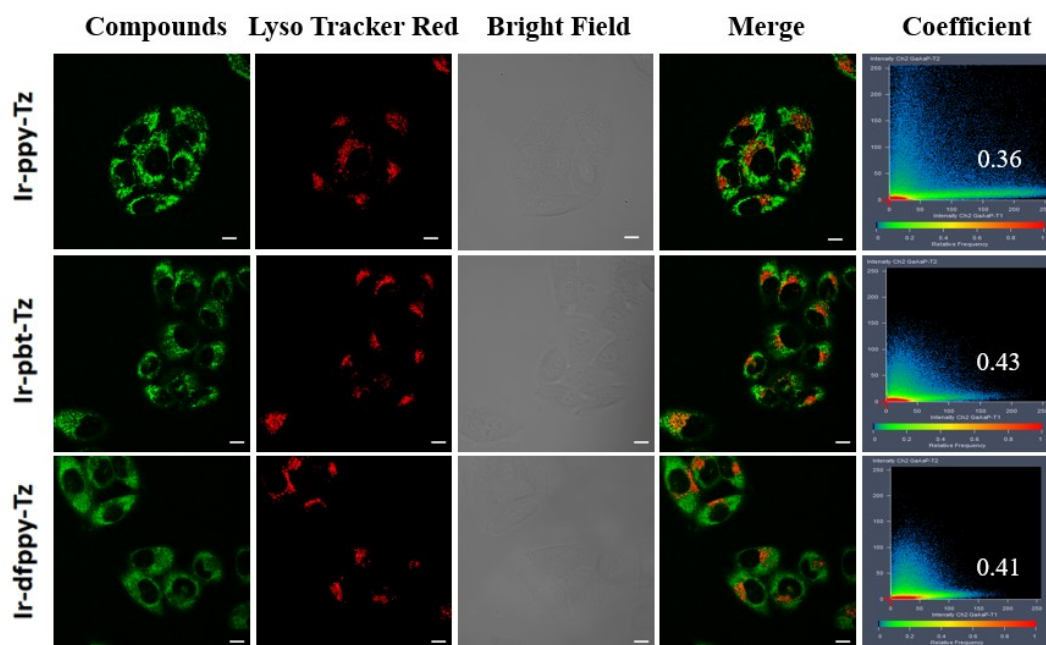

**Fig. S8** CLSM imaging of A549 cells incubated with 1  $\mu$ M Ir(III) complexes for 4 h at 37  $^{\circ}$ C (**Ir-ppy-Tz**:  $\lambda_{\text{ex}}$  = 405 nm,  $\lambda_{\text{em}}$  = 580 - 610 nm; **Ir-pbt-Tz**:  $\lambda_{\text{ex}}$  = 405 nm,  $\lambda_{\text{em}}$  = 540 - 570 nm; **Ir-dfppy-Tz**:  $\lambda_{\text{ex}}$  = 405 nm,  $\lambda_{\text{em}}$  = 510 - 540 nm), followed by 100 nM of LysoTracker Deep Red ( $\lambda_{\text{ex}}$  = 633 nm,  $\lambda_{\text{em}}$  = 650 - 690 nm). Scale bar: 10  $\mu$ m.

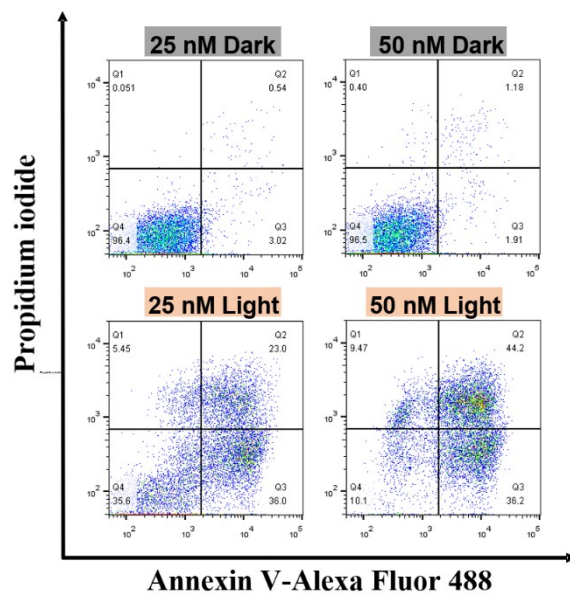

**Fig. S9** Ir-pbt-Tz (50 nM, 4 h, 37 °C) concentration-dependent flow cytometry analysis of cells upon irradiation (405 nm, 20 mW·cm<sup>-2</sup>, 300 s). Cells were stained by Annexin V-FITC ( $\lambda_{\text{ex}} = 488$  nm) and PI ( $\lambda_{\text{ex}} = 543$  nm).

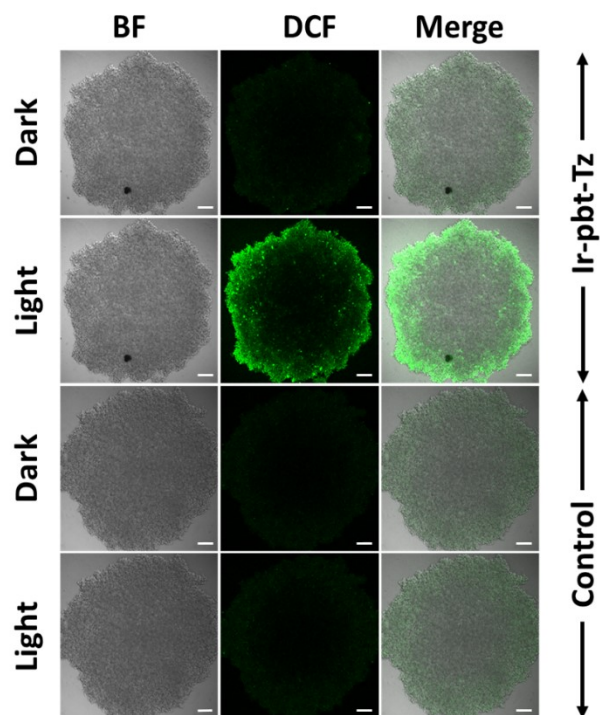

**Fig. S10** CLSM imaging of ROS generation in MCTS incubated with the 1  $\mu$ M DCFH-DA after pre-incubation with **Ir-pbt-Tz** (50 nM, 4 h, 37  $^{\circ}$ C) after two-photon PDT. DCFH-DA:  $\lambda_{ex}$  = 488 nm,  $\lambda_{em}$  = 510 - 540 nm. Scale bar: 100  $\mu$ m.

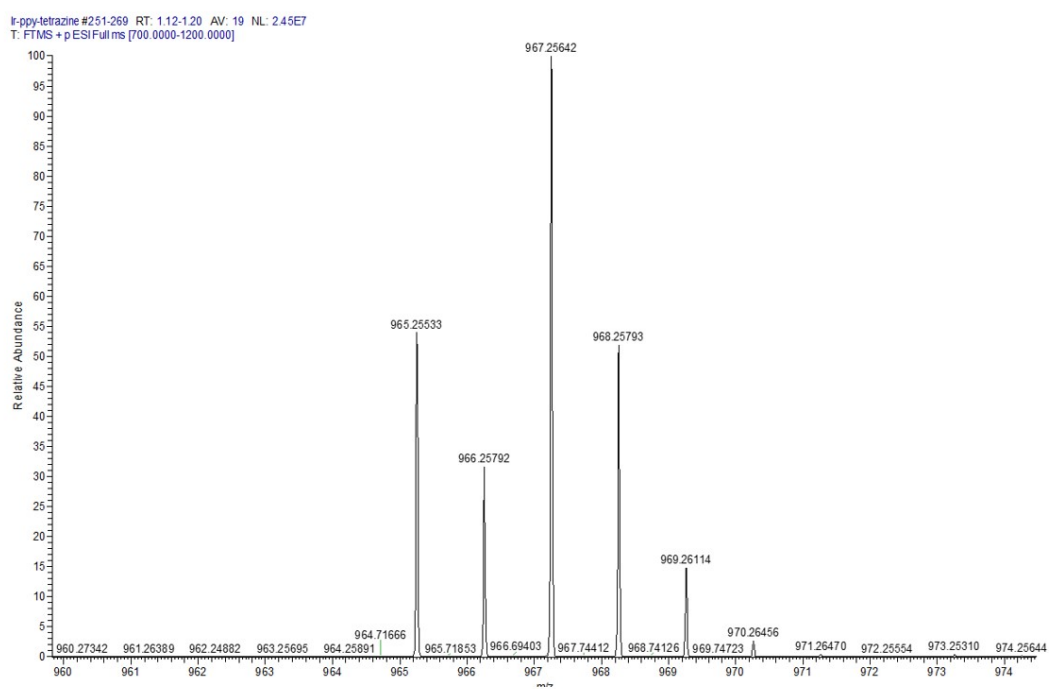

**Fig. S11** HR-ESI-MS spectrum of Ir-ppy-Tz.

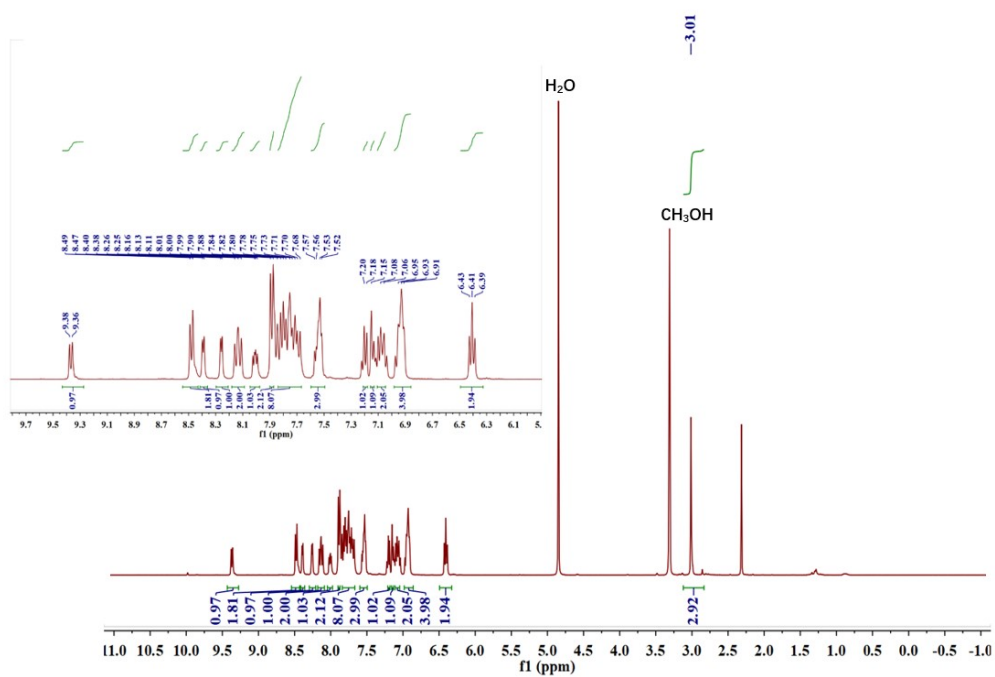

**Fig. S12** <sup>1</sup>H NMR spectrum of Ir-ppy-Tz.

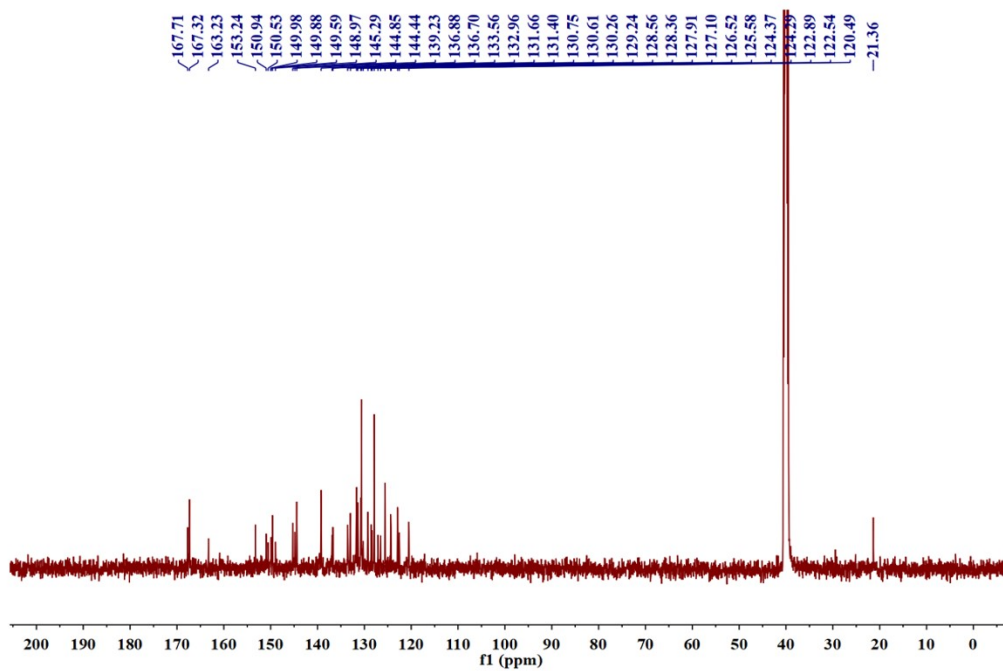

**Fig. S13**  $^{13}\text{C}$  NMR spectrum of **Ir-ppy-Tz**.

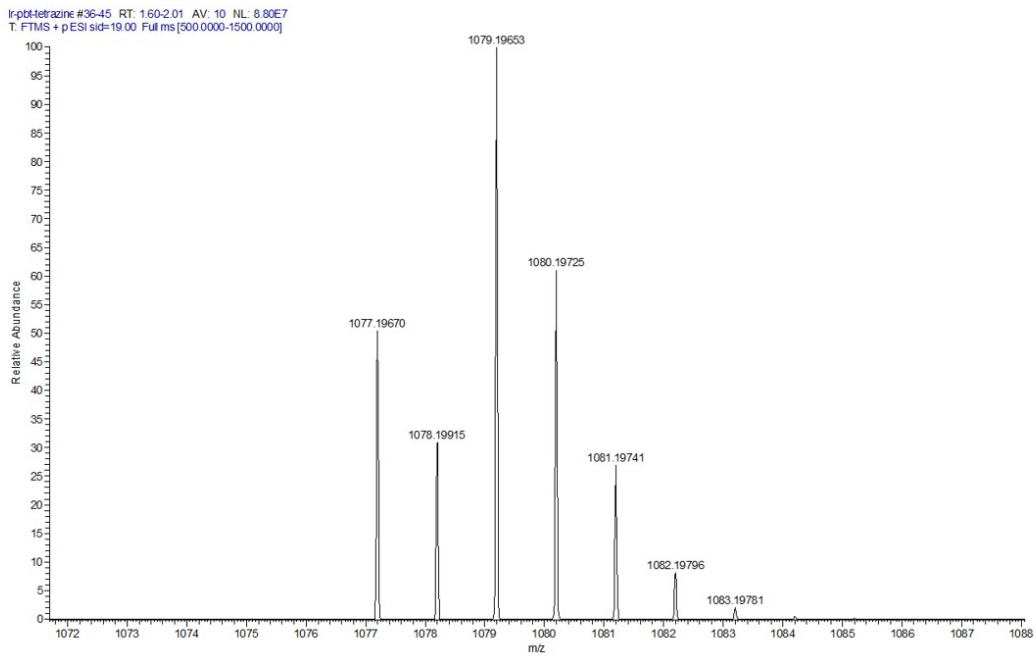

**Fig. S14** HR-ESI-MS spectrum of **Ir-pbt-Tz**.



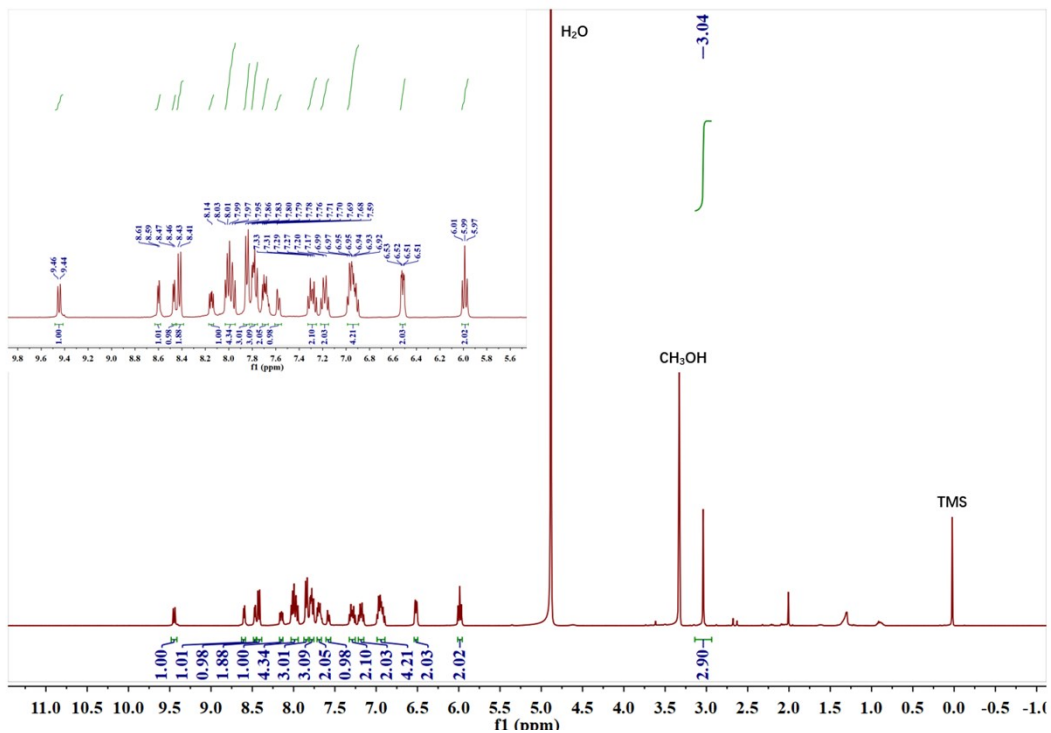

Fig. S15  $^1\text{H}$  NMR spectrum of Ir-pbt-Tz.

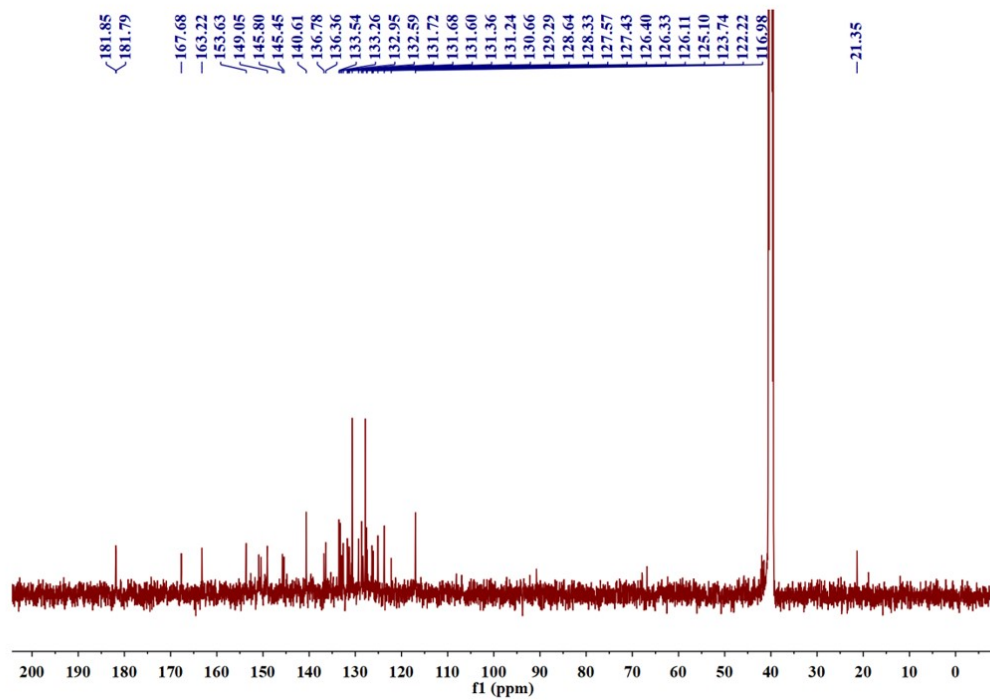

**Fig. S16**  $^{13}\text{C}$  NMR spectrum of Ir-pbt-Tz.

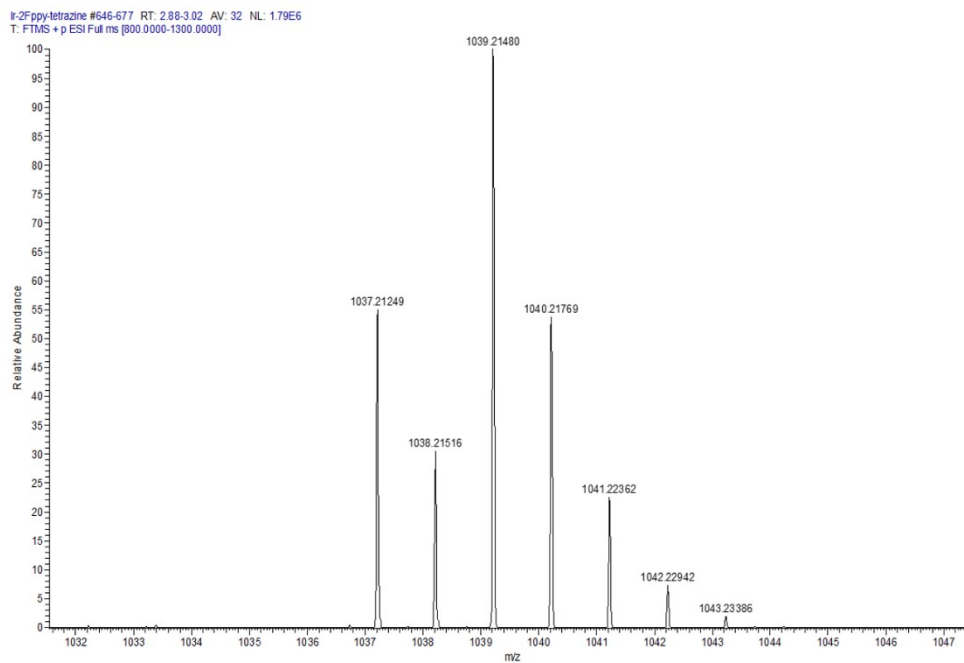

**Fig. S17** HR-ESI-MS spectrum of **Ir-dfppy-Tz**.

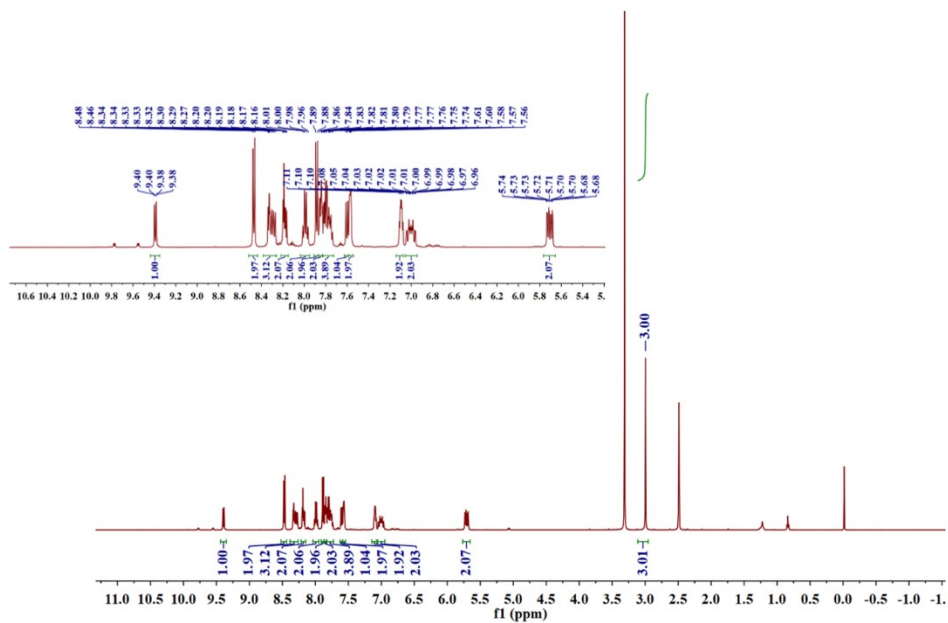

Fig. S18 <sup>1</sup>H NMR spectrum of Ir-dfppy-Tz.

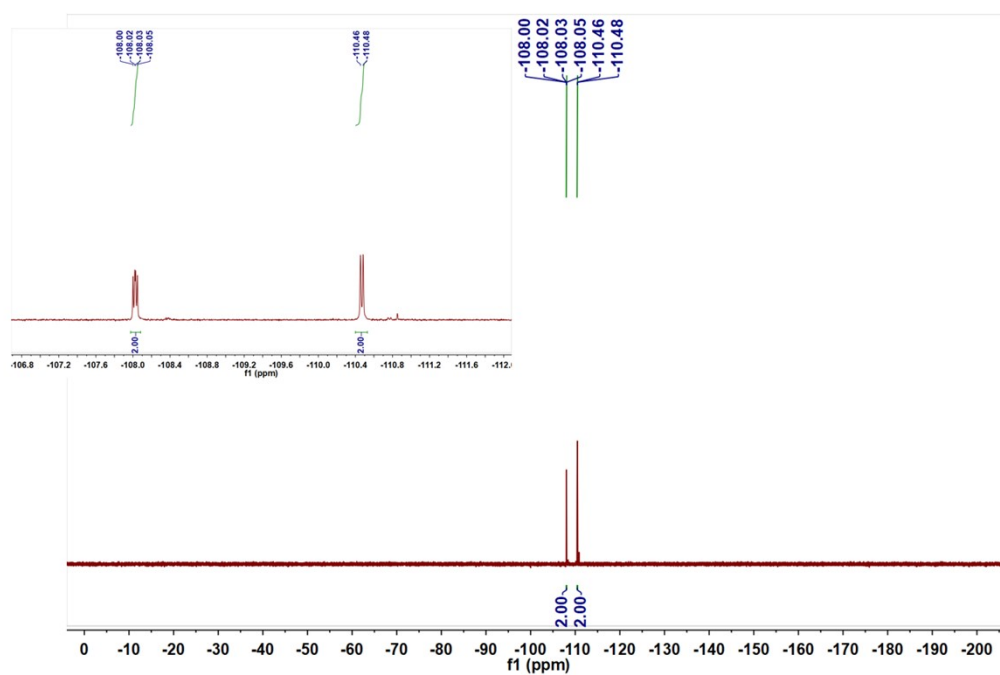

**Fig. S19**  $^{19}\text{F}$  NMR spectrum of Ir-dfppy-Tz.

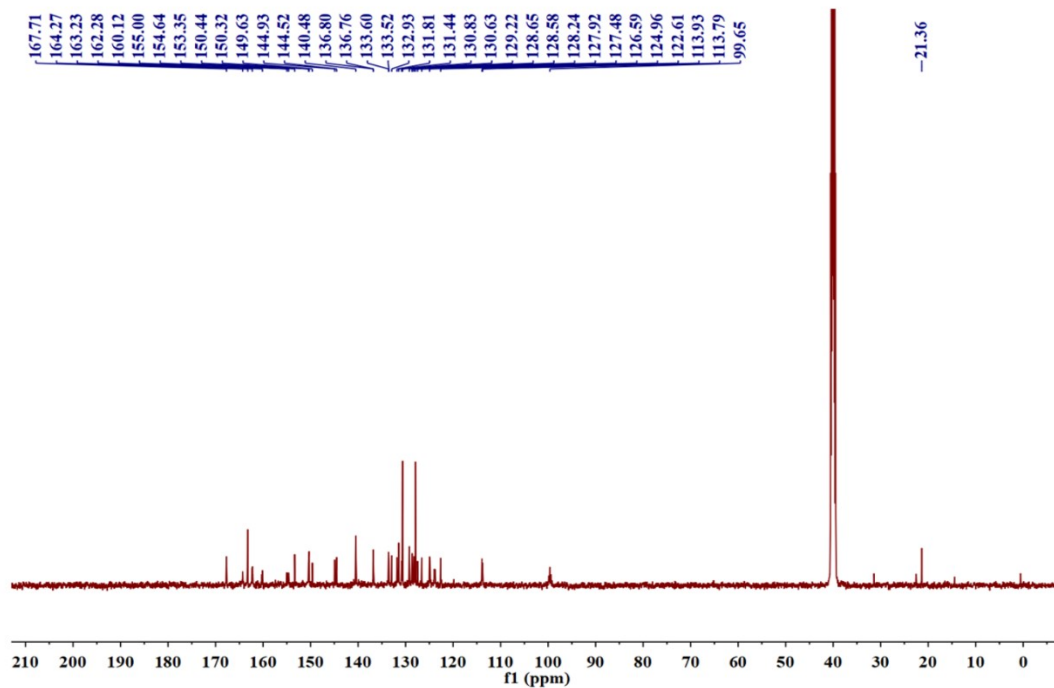

**Fig. S20**  $^{13}\text{C}$  NMR spectrum of Ir-dfppy-Tz.

**Table S1** photophysical properties of designed compounds

| Compd              | $\lambda_{\text{abs}}/\text{nm}$ ( $\epsilon$ , $\times 10^3 \text{ M}^{-1} \cdot \text{cm}^{-1}$ ) | $\lambda_{\text{em}}/\text{nm}$ | $\Phi_{\text{u}}(\text{air}/\text{Ar})$ | $\tau/\text{ns}$ |
|--------------------|-----------------------------------------------------------------------------------------------------|---------------------------------|-----------------------------------------|------------------|
| <b>Ir-ppy-Tz</b>   | 257 (54), 286 (48.9),<br>380 (9.9)                                                                  | 600                             | 0.0101/0.0273                           | 613              |
| <b>Ir-pbt-Tz</b>   | 258 (60.7), 290 (72),<br>401 (14)                                                                   | 559                             | 0.0421/0.1684                           | 475              |
| <b>Ir-dfppy-Tz</b> | 256 (76.7), 290<br>(71.8), 379 (10.2)                                                               | 527                             | 0.0519/0.2751                           | 577              |

**Table S2** single oxygen quantum yields of complexes.

| Compd           | <b>Ru(bpy)<sub>3</sub><sup>2+</sup></b> | <b>[Ir(ppy)<sub>2</sub>(bpy)]<sup>+</sup></b> | <b>[Ir(ppy)<sub>2</sub>(dpip)]<sup>+</sup></b> |
|-----------------|-----------------------------------------|-----------------------------------------------|------------------------------------------------|
| $\Phi_{\Delta}$ | 0.81                                    | 0.35                                          | 0.40                                           |
| Compd           | <b>Ir-ppy-Tz</b>                        | <b>Ir-pbt-Tz</b>                              | <b>Ir-dfppy-Tz</b>                             |
| $\Phi_{\Delta}$ | 0.56                                    | 0.72                                          | 0.62                                           |
